# Supplementary material for: Synergistic promotion of transition metal ion-exchange in TiO2 nanoarray-based monolithic catalysts for the selective catalytic reduction of NOx with NH3
Source: Royal Society of Chemistry journal article supplement (doi:10.1039/d2cy00996j), 2022-01-01
Supplement: d2cy00996j1.pdf [file d2cy00996j1.pdf]

### Supporting Information

#### **Synergistic Promotion of Transition Metal Ion-exchange in TiO<sub>2</sub> Nanoarray-based Monolithic Catalysts for Selective Catalytic Reduction of NO<sub>x</sub> with NH<sub>3</sub>**

Xingxu Lu<sup>a,b</sup>, Yanliu Dang<sup>b</sup>, Meilin Li<sup>c</sup>, Chunxiang Zhu<sup>a,b</sup>, Fangyuan Liu<sup>b</sup>, Wenxiang Tang<sup>a,b</sup>, Junfei Weng<sup>a,b</sup>, Mingyue Ruan<sup>a</sup>, Steven L. Suib<sup>b,c</sup>, Pu-Xian Gao<sup>a,b,\*</sup>

<sup>a</sup> Department of Materials Science and Engineering, University of Connecticut, Storrs, CT 06269, USA

<sup>b</sup> Institute of Materials Science, University of Connecticut, Storrs, CT 06269, USA

<sup>c</sup> Department of Chemistry, University of Connecticut, Storrs, CT 06269, USA

\* Email: [puxian.gao@uconn.edu](mailto:puxian.gao@uconn.edu)

**KEYWORDS:** NH<sub>3</sub>-SCR; TiO<sub>2</sub>; Nanoarray; NO<sub>x</sub> abatement; Transition metal oxides; Ion-exchange; Aftertreatment; Monolithic catalyst.

## 1. Experimental Procedures

### 1.1 Preparation of LPT nanoarrays

The LPT nanoarrays were integrated onto the commercial cordierite honeycombs via a facile microwave-assisted hydrothermal method introduced in our previous work.<sup>1</sup> Before to the synthesis, the as-cleaned cordierite monoliths were seeded using a TiO<sub>2</sub> polymeric sol (0.025 mol/L) followed by calcination. The seeded substrates (5 cm × 5 cm × 2 cm) were then soaked into the solution containing 10.5 mL hydrochloride acid (HCl, 37%, Sigma-Aldrich), 9 mL titanium (III) chloride (TiCl<sub>3</sub>, 20% w/v solution in 2M HCl acid, Acros Organics™) and 45 mL hydrogen peroxide (H<sub>2</sub>O<sub>2</sub>, 30%, SIGMA-ALDRICH) in 555 mL deionized (DI) water with the channels perpendicular to the beaker bottom. The hydrothermal synthesis was carried out at 90 °C for 60 min in a BP-125 laboratory microwave (Microwave Research & Applications, Inc.) until the color of the reactant solution turned from deep red to yellow with no more bubbles emerging from the channels. The LPT nanoarrays were rinsed with DI water and dried in oven at 90 °C overnight.

### 1.2 Preparation of transition metal doped TiO<sub>2</sub> nanoarrays

The transition metal elements were firstly loaded onto the LPT nanoarrays through an ion-exchange process. The LPT nanoarray rooted honeycomb was cut into 2 cm<sup>3</sup> blocks and soaked into the solution containing proper amounts of transition metal precursors, including NH<sub>4</sub>VO<sub>3</sub>, Cr(NO<sub>3</sub>)<sub>3</sub>·9H<sub>2</sub>O, Mn(NO<sub>3</sub>)<sub>2</sub>·4H<sub>2</sub>O, Fe(NO<sub>3</sub>)<sub>3</sub>·9H<sub>2</sub>O, Co(NO<sub>3</sub>)<sub>2</sub>·6H<sub>2</sub>O, Ni(NO<sub>3</sub>)<sub>2</sub>·6H<sub>2</sub>O, Cu(NO<sub>3</sub>)<sub>2</sub>·3H<sub>2</sub>O, La(NO<sub>3</sub>)<sub>3</sub>·6H<sub>2</sub>O, Ce(NO<sub>3</sub>)<sub>3</sub>·6H<sub>2</sub>O. The capped vials were kept in an oven at 80 °C for 12 h, and then the

solution was evaporated at 80 °C until dry. Upon most of the solution had been evaporated, the substrates were flipped every 15-20 min to enhance the uniformity. Finally, the sample was calcined at 500°C for 2 hours, during which, the LPT nanoarrays were converted into anatase TiO<sub>2</sub> structure, resulting the TiO<sub>2</sub> nanoarray supported transition metal catalysts (X/TNA). More specifically, the standard solution containing the precursors with a concentration of 1g transition metal element per liter DI water were prepared. Meanwhile, the LPT nanoarray rooted honeycomb samples were all cut into standard cubes of 2 cm<sup>3</sup>. Therefore, the amount of transition metal elements for each sample can be calculated according to the designed loading amount. For example, for the monometallic 100Mn/TNA sample, it contains 100g Mn/ft<sup>3</sup> of the substrate. For a cubic honeycomb sample of 2 cm<sup>3</sup>, it is 7.06293e-5 ft<sup>3</sup> in volume, so it requires 7.06293e-3g Mn element in the solution. Therefore, the 100Mn/TNA sample needs 7.06293 ml standard solution. All the mono-, bi- and tri-metallic samples were prepared in this way.

The contents of the prepared catalysts are summarized in **Table S1**.

### 1.3 Catalyst composition

**Table S1.** Composition information of the samples prepared in the present work.

| ID            | Notation | Metal loading          |
|---------------|----------|------------------------|
| Mono-metallic |          |                        |
| 1-1           | 50V/TNA  | 50g V/ft <sup>3</sup>  |
| 1-2           | 50Cr/TNA | 50g Cr/ft <sup>3</sup> |
| 1-3           | 50Mn/TNA | 50g Mn/ft <sup>3</sup> |
| 1-4           | 50Fe/TNA | 50g Fe/ft <sup>3</sup> |
| 1-5           | 50Co/TNA | 50g Co/ft <sup>3</sup> |

|              |                   |                                   |                 |
|--------------|-------------------|-----------------------------------|-----------------|
| 1-6          | 50Ni/TNA          | 50g Ni/ft <sup>3</sup>            |                 |
| 1-7          | 50Cu/TNA          | 50g Cu/ft <sup>3</sup>            |                 |
| 1-8          | 50La/TNA          | 50g La/ft <sup>3</sup>            |                 |
| 1-9          | 50Ce/TNA          | 50g Ce/ft <sup>3</sup>            |                 |
| 3-3          | 100Mn/TNA         | 100g Mn/ft <sup>3</sup>           |                 |
| 3-7          | 100Cu/TNA         | 100g Cu/ft <sup>3</sup>           |                 |
| 3-9          | 100Ce/TNA         | 100g Ce/ft <sup>3</sup>           |                 |
| 11-1         | 50Mn/TNA          | 50g Mn/ft <sup>3</sup>            |                 |
| 11-2         | 100Mn/TNA         | 100g Mn/ft <sup>3</sup>           |                 |
| 11-3         | 200Mn/TNA         | 200g Mn/ft <sup>3</sup>           |                 |
| Bi-metallic  |                   |                                   |                 |
| 2-1          | 50-2V-5Mn/TNA     | 50g (V, Mn)/ft <sup>3</sup>       | V/Mn=2/5        |
| 2-2          | 50-2Cr-5Mn/TNA    | 50g (Cr, Mn)/ft <sup>3</sup>      | Cr/Mn=2/5       |
| 2-4          | 50-2Fe-5Mn/TNA    | 50g (Fe, Mn)/ft <sup>3</sup>      | Fe/Mn=2/5       |
| 2-5          | 50-2Co-5Mn/TNA    | 50g (Co, Mn)/ft <sup>3</sup>      | Co/Mn=2/5       |
| 2-6          | 50-2Ni-5Mn/TNA    | 50g (Ni, Mn)/ft <sup>3</sup>      | Ni/Mn=2/5       |
| 2-7          | 50-2Cu-5Mn/TNA    | 50g (Cu, Mn)/ft <sup>3</sup>      | Cu/Mn=2/5       |
| 2-8          | 50-2La-5Mn/TNA    | 50g (La, Mn)/ft <sup>3</sup>      | La/Mn=2/5       |
| 2-9          | 50-2Ce-5Mn/TNA    | 50g (Ce, Mn)/ft <sup>3</sup>      | Ce/Mn=2/5       |
| 4-7          | 100-2Cu-5Mn/TNA   | 100g (Cu, Mn)/ft <sup>3</sup>     | Cu/Mn=2/5       |
| 4-9          | 100-2Ce-5Mn/TNA   | 100g (Ce, Mn)/ft <sup>3</sup>     | Ce/Mn=2/5       |
| 5-7          | 100-Cu-Mn/TNA     | 100g (Cu, Mn)/ft <sup>3</sup>     | Cu/Mn=1/1       |
| 5-9          | 100-Ce-Mn/TNA     | 100g (Ce, Mn)/ft <sup>3</sup>     | Ce/Mn=1/1       |
| 6-7          | 100-5Cu-2Mn/TNA   | 100g (Cu, Mn)/ft <sup>3</sup>     | Cu/Mn=5/2       |
| 6-9          | 100-5Ce-2Mn/TNA   | 100g (Ce, Mn)/ft <sup>3</sup>     | Ce/Mn=5/2       |
| Tri-metallic |                   |                                   |                 |
| 8-1          | 50-Cu-Ce-Mn/TNA   | 50g (Cu, Ce, Mn)/ft <sup>3</sup>  | Ce/Cu/Mn=1/1/1  |
| 8-2          | 100-Cu-Ce-Mn/TNA  | 100g (Cu, Ce, Mn)/ft <sup>3</sup> | Ce/Cu/Mn=1/1/1  |
| 8-3          | 200-Cu-Ce-Mn/TNA  | 200g (Cu, Ce, Mn)/ft <sup>3</sup> | Ce/Cu/Mn=1/1/1  |
| 9-1          | 50-Cu-Ce-5Mn/TNA  | 50g (Cu, Ce, Mn)/ft <sup>3</sup>  | Ce/Cu/Mn=1/1/5  |
| 9-2          | 100-Cu-Ce-5Mn/TNA | 100g (Cu, Ce, Mn)/ft <sup>3</sup> | Ce/Cu/Mn=1/1/5  |
| 9-3          | 200-Cu-Ce-5Mn/TNA | 200g (Cu, Ce, Mn)/ft <sup>3</sup> | Ce/Cu/Mn=1/1/5  |
| 10-1         | 50-Cu-Ce-10Mn/TNA | 50g (Cu, Ce, Mn)/ft <sup>3</sup>  | Ce/Cu/Mn=1/1/10 |

|      |                    |                                   |                 |
|------|--------------------|-----------------------------------|-----------------|
| 10-2 | 100-Cu-Ce-10Mn/TNA | 100g (Cu, Ce, Mn)/ft <sup>3</sup> | Ce/Cu/Mn=1/1/10 |
| 10-3 | 200-Cu-Ce-10Mn/TNA | 200g (Cu, Ce, Mn)/ft <sup>3</sup> | Ce/Cu/Mn=1/1/10 |

#### 1.4 Details of H<sub>2</sub>-TPR and NO/NH<sub>3</sub> TPD

Hydrogen temperature programmed reduction (H<sub>2</sub>-TPR) was carried out in a ChemiSorb 2720 Pulse Chemisorption System equipped with a TCD detector. Each sample was heated to 550 °C in the 5% O<sub>2</sub>/N<sub>2</sub> for 1 h followed by cooling to room temperature before the test. The H<sub>2</sub>-TPR was conducted from the 30 to 800 °C at a heating rate of 10 °C/min under 40 sccm 4% H<sub>2</sub>/N<sub>2</sub>. The H<sub>2</sub> consumption was calculated from the calibration by Copper (II) oxide (CuO, SIGMA-ALDRICH) tested under the same conditions.

Temperature Programmed Desorption (TPD) measurements were performed using a fixed-bed tube reactor, and a Fourier transform infrared spectrometer (FTIR, ThermoFisher Nicolet 6700) equipped with a 2 m path length gas cell (250 mL) was employed to monitor the concentrations of NO, NO<sub>2</sub>, N<sub>2</sub>O, and NH<sub>3</sub> at the exit. The samples were pretreated in 5 vol.% O<sub>2</sub>/N<sub>2</sub> at 550 °C for 1 h and then cooled to 50 °C before each test. For NH<sub>3</sub>-TPD, the samples were firstly flushed in 500 ppm NH<sub>3</sub>/N<sub>2</sub> flow (300 sccm) at 50 °C for 1 h, and then the physisorbed NH<sub>3</sub> was removed by purging in N<sub>2</sub> (300 sccm) at 50 °C until no NH<sub>3</sub> was detected. Subsequently, the catalyst was heated in N<sub>2</sub> (300 sccm) from 50 °C to 650 °C with a ramp of 10 °C/min for the NH<sub>3</sub> desorption. For NO TPD, feed gas was changed to 500 ppm NO/N<sub>2</sub> flow (300 sccm), and the temperature was programmed in the same way as the NH<sub>3</sub> TPD.

#### 1.5 Details of catalyst stability tests

The stability tests were conducted using the performance testing conditions and kept at

220 and 315 °C for 50 h, respectively. The composition of exit gases (i.e., NO, NH<sub>3</sub>, NO<sub>2</sub>, and N<sub>2</sub>O) were continuously analyzed by an online FTIR. The sulfur poisoning effects on the catalyst performance were also evaluated following USDRIVE's protocol,<sup>2</sup> in which the catalyst was exposed to 5 ppm SO<sub>2</sub> added to the feed gas stream at 300 °C for 5 h. A total sulfur exposure level of 1 g sulfur per liter of catalyst was estimated following this exposure condition. After sulfur exposure, SO<sub>2</sub> was removed from the feed and the sample was cooled to 100 °C, from which point the catalyst performance was evaluated following the normal procedure.

## 2. Results and Discussion

### 2.1 Catalytic performance tests

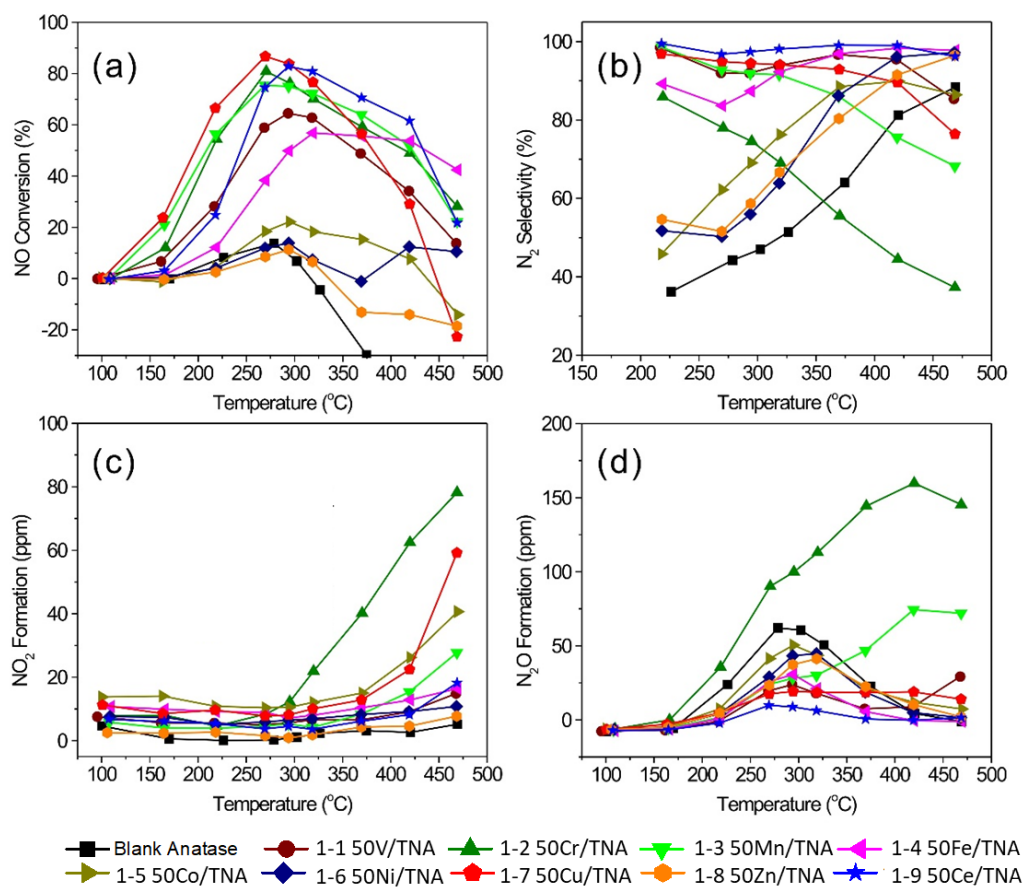

**Figure S1.** (a) NO conversion, (b) N<sub>2</sub> selectivity, (c) NO<sub>2</sub> formation and (d) N<sub>2</sub>O formation of monometallic TiO<sub>2</sub> nanoarray (TNA) based monolithic catalysts.

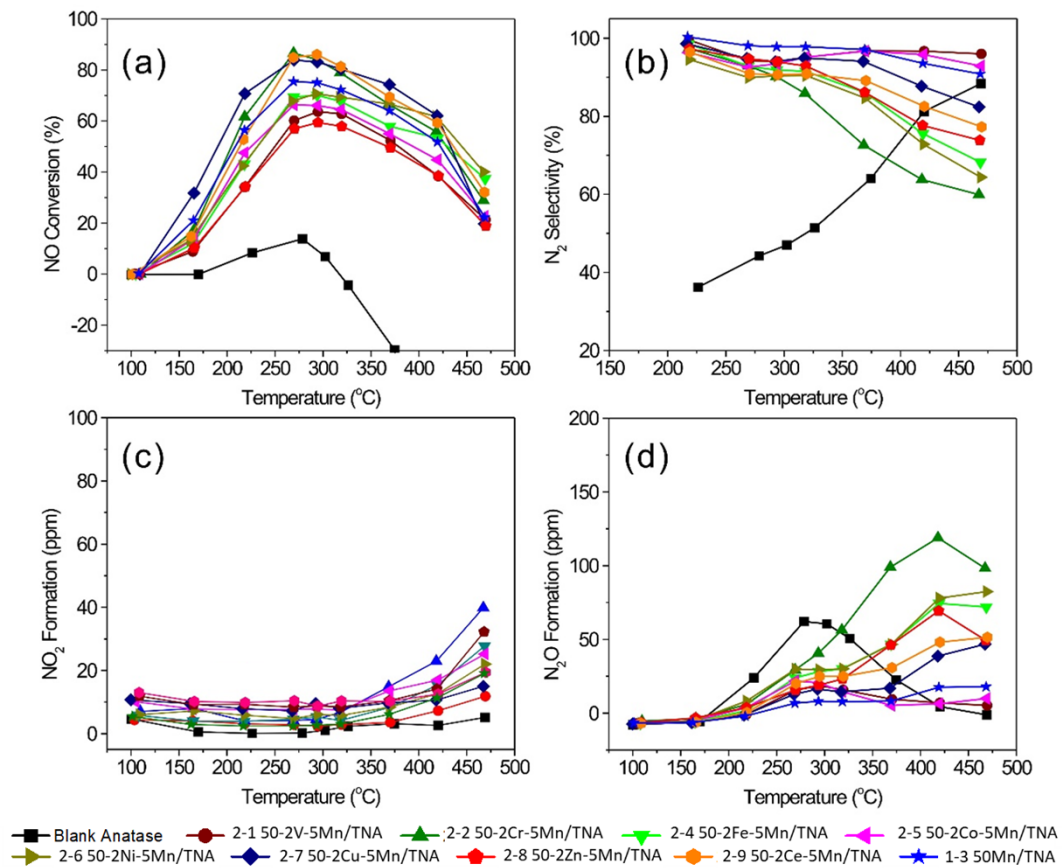

**Figure S2.** (a) NO conversion, (b) N<sub>2</sub> selectivity, (c) NO<sub>2</sub> formation and (d) N<sub>2</sub>O formation of the bimetallic TiO<sub>2</sub> nanoarray (TNA) based monolithic catalysts.



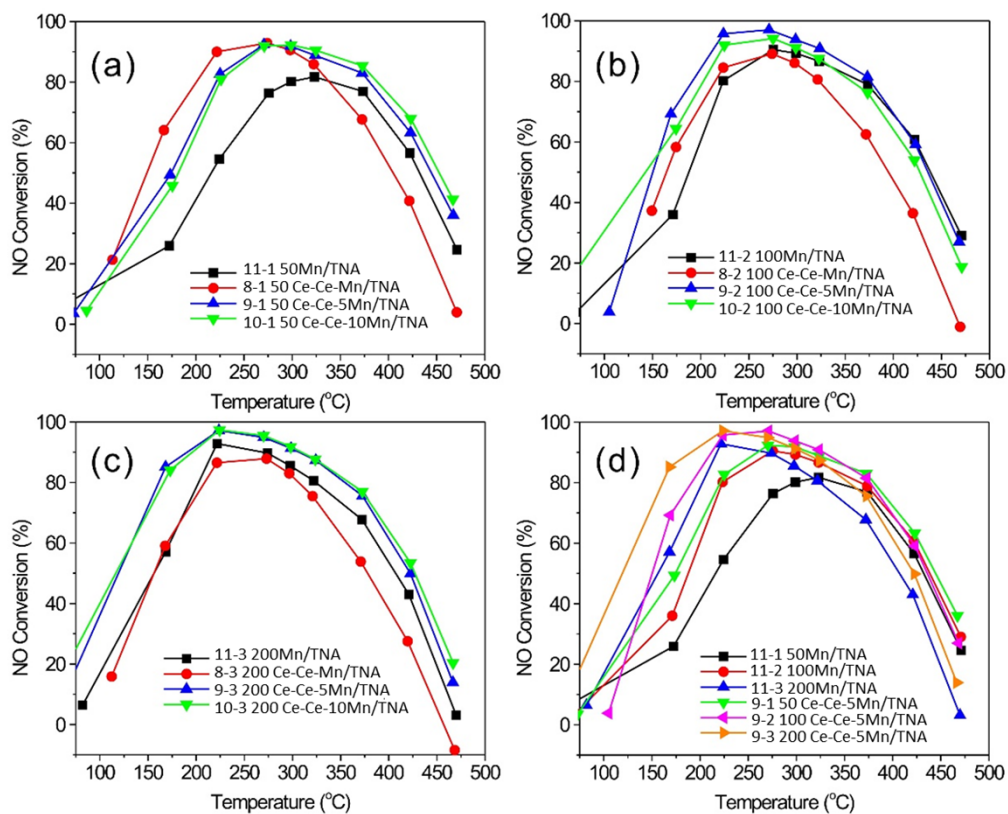

**Figure S3.** Catalytic performance of the trimetallic catalysts towards NO oxidation.

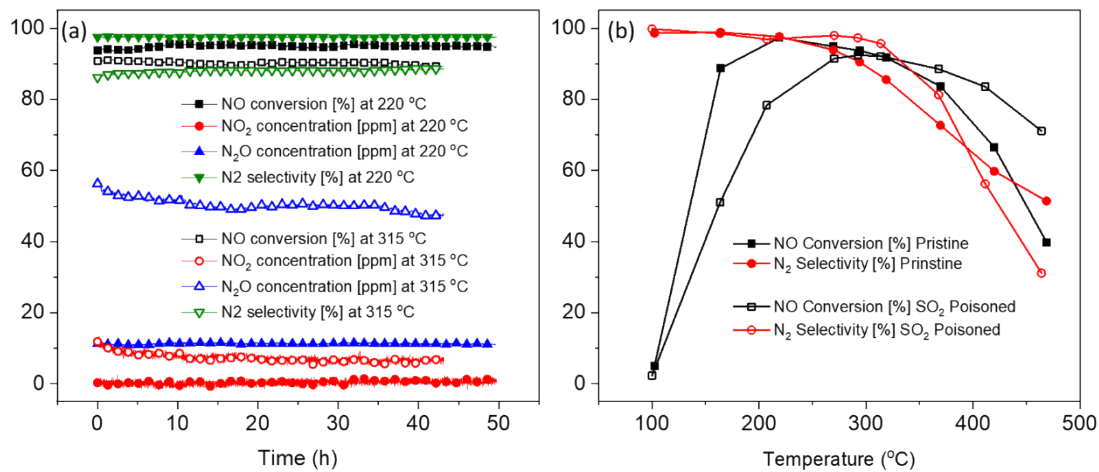

**Figure S4.** (a) Stability tests at 220 °C (solid symbols) and 315 °C (solid symbols) and the (b) Sulfur poisoning resistance tests over the trimetallic Cu-Ce-5Mn/TNA catalyst.

## 2.2 Structural Characterization

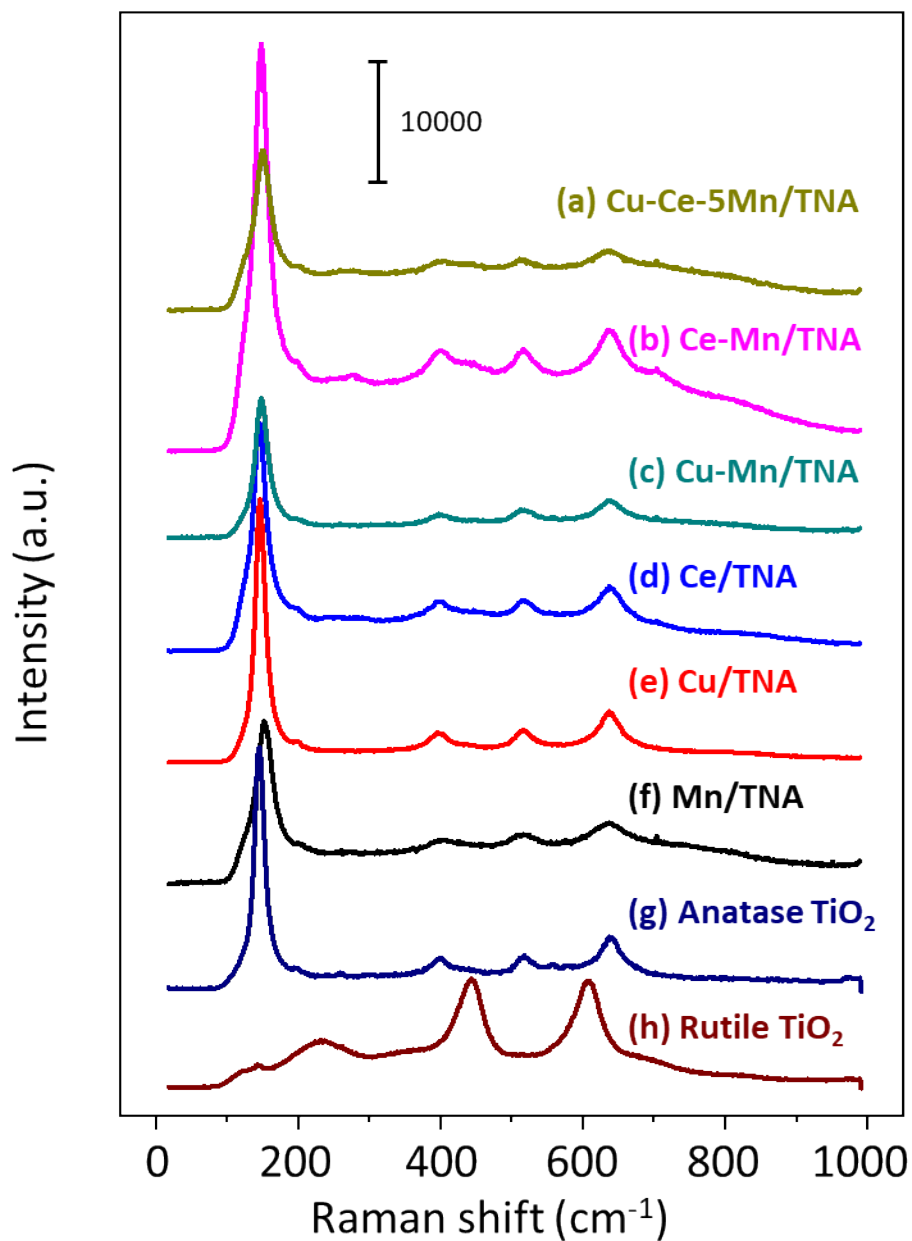

**Figure S5.** Raman spectra of the transition metal doped nanoarray catalysts: (a) 9-2\_100Cu-Ce-5Mn/TNA, (b) 5-9\_100Ce-Mn/TNA, (c) 5-7\_100Cu-Mn/TNA, (d) 3-9\_100Ce/TNA, (e) 3-7\_100Cu/TNA, (f) 3-3\_100Mn/TNA, (g) Anatase TiO<sub>2</sub>, (h) Rutile TiO<sub>2</sub>.

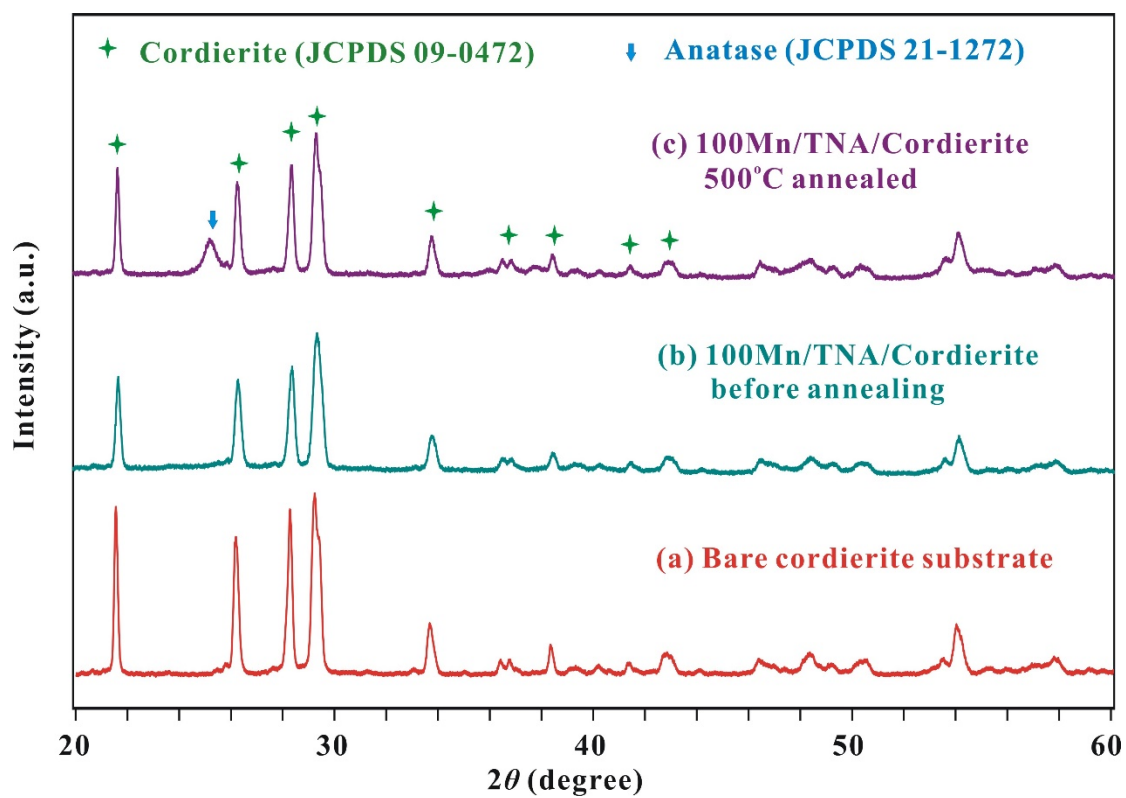

**Figure S6.** XRD patterns of the 100Mn/TNA sample (b) before and (c) after the calcination at 500°C as well as (a) the bare cordierite substrates

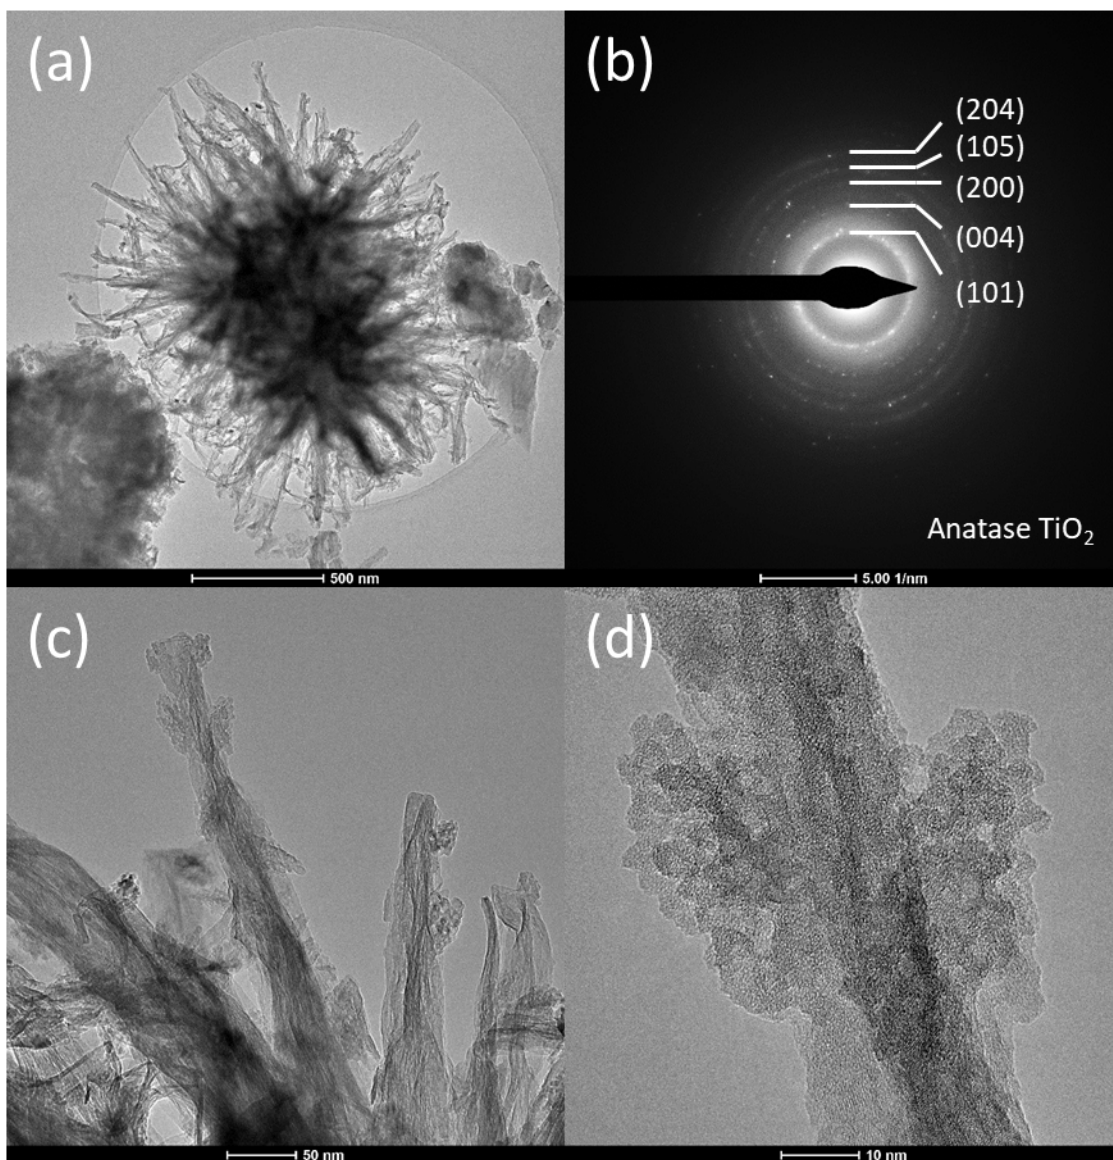

**Figure S7.** The (a) and (c) BF images, (b) SAED pattern and (d) HRTEM image of the Ce doped TiO<sub>2</sub> nanoarray (TNA) catalysts, 3-9\_100Ce/TNA. The distinctive diffraction rings can be indexed by Anatase TiO<sub>2</sub> (JSPDS 21-1272).

### 2.3 Catalyst Reducibility

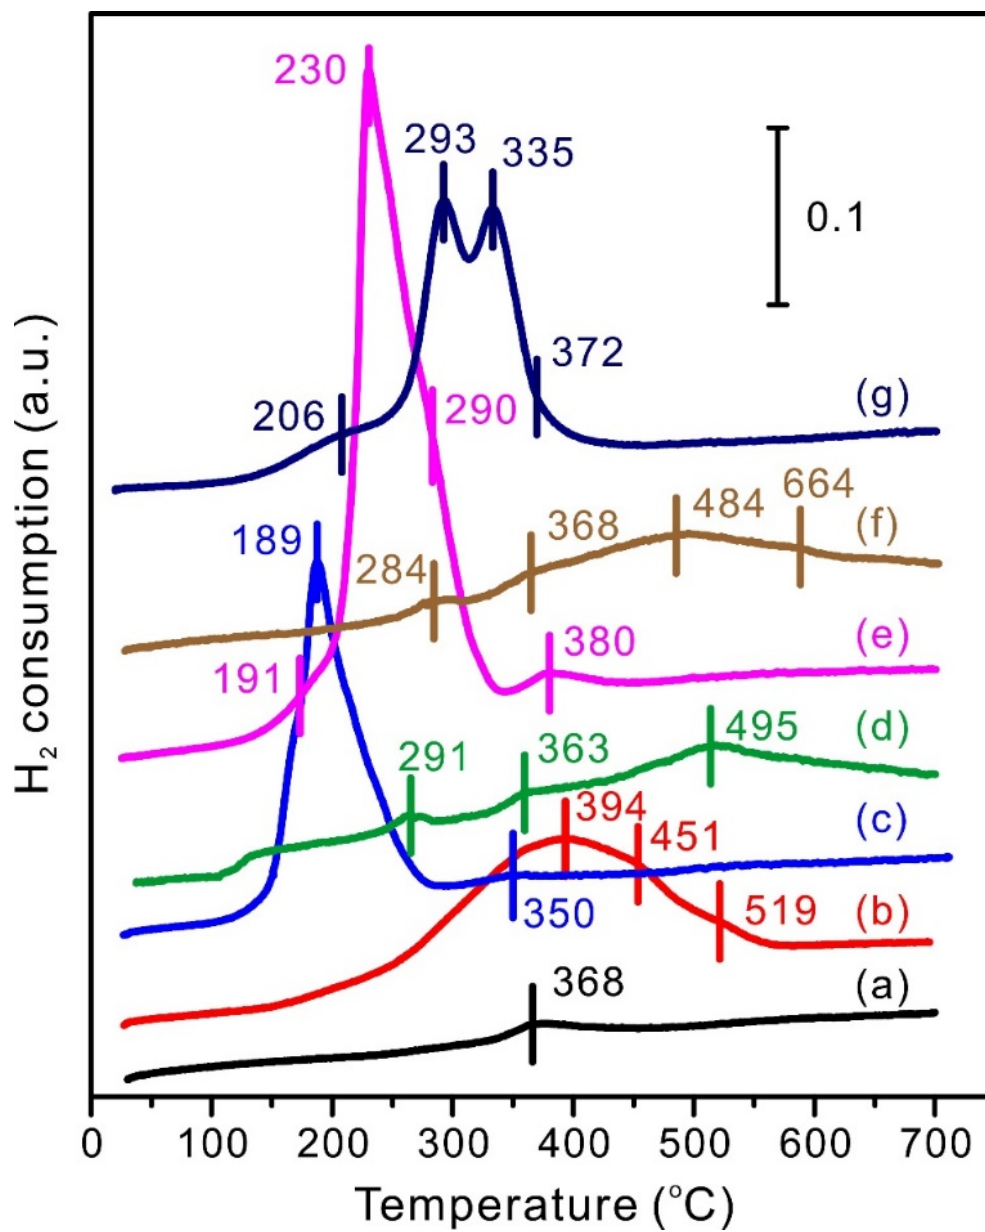

**Figure S8.** H<sub>2</sub>-TPR profile for (a) blank TiO<sub>2</sub>, (b) 100Mn/TNA, (c) 100Cu/TNA, (d) 100Ce/TNA, (e) 100-Cu-Mn/TNA, (f) 100-Ce-Mn/TNA and (g) 100-Cu-Ce-Mn/TNA.

For the blank TiO<sub>2</sub> nanoarrays, there is only one reduction peak at 368 °C with quite low intensity (**Fig. S8a**), which is ascribed to the reduction of the surface capping oxygens on the TiO<sub>2</sub> surfaces.<sup>3, 4</sup> Therefore, the H<sub>2</sub> consumption in the other samples result from the reduction of the other species.

The monometallic Mn/TNA catalyst (**Fig. S8b**) exhibits a broad reduction peak, which can be split into three peaks at 394, 451 and 519 °C corresponding to the reductions of Mn<sup>4+</sup> to Mn<sup>3+</sup>, Mn<sup>3+</sup> to Mn<sup>2.67+</sup> and Mn<sup>2.67+</sup> to Mn<sup>2+</sup>, respectively.<sup>5, 6</sup> The broad reduction peak results from the complete intercalation of the Mn atoms into the TiO<sub>2</sub> lattice without phase segregation, making the reduction of the manganese species occur gradually in a wide temperature range instead of showing sharp reduction peaks.

The reduction profile of the 100Cu/TNA catalyst exhibits two broad peaks at 189 and 350 °C, which can be ascribed to the reduction of the Cu<sup>2+</sup> to Cu<sup>1+</sup>, in particular to the isolated copper atoms, and the monovalent copper species, respectively (**Fig. S8c**).<sup>7, 8</sup>

The 100Ce/TNA catalyst shows two weak peaks at 291, 363 °C and one broad peak at 495 °C (**Fig. S8d**), which can be assigned to the reduction of the amorphous ceria on the TiO<sub>2</sub> nanoarray surfaces (T<sub>1</sub> = 291 °C, Ce<sup>4+</sup>-O-Ce<sup>4+</sup>), the surface capping oxygen on the TiO<sub>2</sub> surface (T<sub>2</sub> = 363 °C),<sup>3, 4</sup> and the bulk CeO<sub>2</sub> (T<sub>3</sub> = 495 °C),<sup>9, 10</sup> respectively.

The low intensity of the third peak reveals a high dispersion of ceria on the support avoiding large agglomerates which is in accordance with the XRD results that no CeO<sub>2</sub> crystalline phases are detectable.<sup>7, 11</sup>

When Cu and Mn were combined, four reduction peaks are observed over the 100Cu-Mn/TNA catalyst at 191, 230, 290 and 380 °C, respectively (**Fig. S8e**). The broad peak

centered at 191 °C ( $T_1$ ) can be attributed to the reduction of CuO particles having strong interaction with the TiO<sub>2</sub> support, while the sharp reduction peak centered at 230 °C ( $T_2$ ) is mainly due to the reduction of CuO particles having little or no interaction with the support.<sup>8, 12</sup> There is a shoulder peak on the right side of the  $T_2$  peak centered at ~290 °C ( $T_3$ ), which can be assigned to the reduction of MnO<sub>2</sub> to Mn<sub>2</sub>O<sub>3</sub>. The broad peak at 380 °C ( $T_4$ ) is possible to correspond to the reduction of Mn<sub>2</sub>O<sub>3</sub> species. Compared to the reduction profile of 100Mn/TNA, the intensity of the reduction peak of MnO<sub>2</sub> to Mn<sub>2</sub>O<sub>3</sub> ( $T_3$ ) increased significantly, indicating the increased Mn<sup>4+</sup>/Mn<sup>3+</sup> ratio in the 100Cu-Mn/TNA catalyst (**Table 1**). Furthermore, the total H<sub>2</sub> consumption of the 100Cu-Mn/TNA catalyst is much higher than that of the 100Cu/TNA and 100Mn/TNA catalysts, and the peak temperature also decreases from 394 to 290 °C. All these observations help to explain the enhanced low-temperature catalytic activity of the Cu-doped samples because the total H<sub>2</sub> consumption is an indicator of the low temperature reactivity of the catalysts.

Compared with the enhanced H<sub>2</sub> consumption over the Cu-Mn/TNA catalysts (3,504 μmole/g), the Ce-Mn/TNA catalyst exhibits a broad and weak peak from 200 to 700 °C with a decreased H<sub>2</sub> consumption of 1322 μmole/g (**Fig. S8f** and **Table 1**). More specifically, the broad reduction peak can be fitted into one broad peak at 484 °C ( $T_3$ ), and three small peaks centered at 284 ( $T_1$ ), 368 ( $T_2$ ) and 664 °C ( $T_4$ ), respectively, which can be assigned to the reduction of the Mn species and the reduction of amorphous ceria on the TiO<sub>2</sub> surfaces (Ce<sup>4+</sup>-O-Ce<sup>4+</sup>), the surface capping oxygen<sup>3, 4</sup>, and the (Ce<sup>3+</sup>-O-Ce<sup>4+</sup>) of bulk CeO<sub>2</sub>, respectively.<sup>9, 10</sup> Compared with the pure Mn/TNA

and Ce/TNA catalysts, the reduction temperatures of all the species in the bimetallic Ce-Mn/TNA catalysts increase correspondingly.

Finally, the H<sub>2</sub>-TPR profile of the trimetallic Cu-Ce-Mn/TNA catalyst combines the properties of the mono- and bimetallic catalysts, and four distinctive peaks are identified in **Fig. S8g**, including the reduction of CuO particles being in strong ( $T_1 = 206$  °C) and little ( $T_2 = 293$  °C) interactions with the TiO<sub>2</sub> supports,<sup>8, 12</sup> and the reduction of MnO<sub>2</sub> ( $T_3 = 335$  °C) and Mn<sub>2</sub>O<sub>3</sub> ( $T_4 = 372$  °C), respectively. Compared to Cu-Mn/TNA, the reduction temperatures of  $T_1$ ,  $T_2$ , and  $T_3$  of the Cu-Ce-Mn/TNA catalysts increased correspondingly. The total H<sub>2</sub> consumption of the Cu-Ce-Mn/TNA catalyst (2,123 μmole/g) is also lower than that of the Cu-Mn/TNA (3,504 μmole/g), which is due to the introduction of Ce element.



## 2.4. Surface Adsorption and Desorption

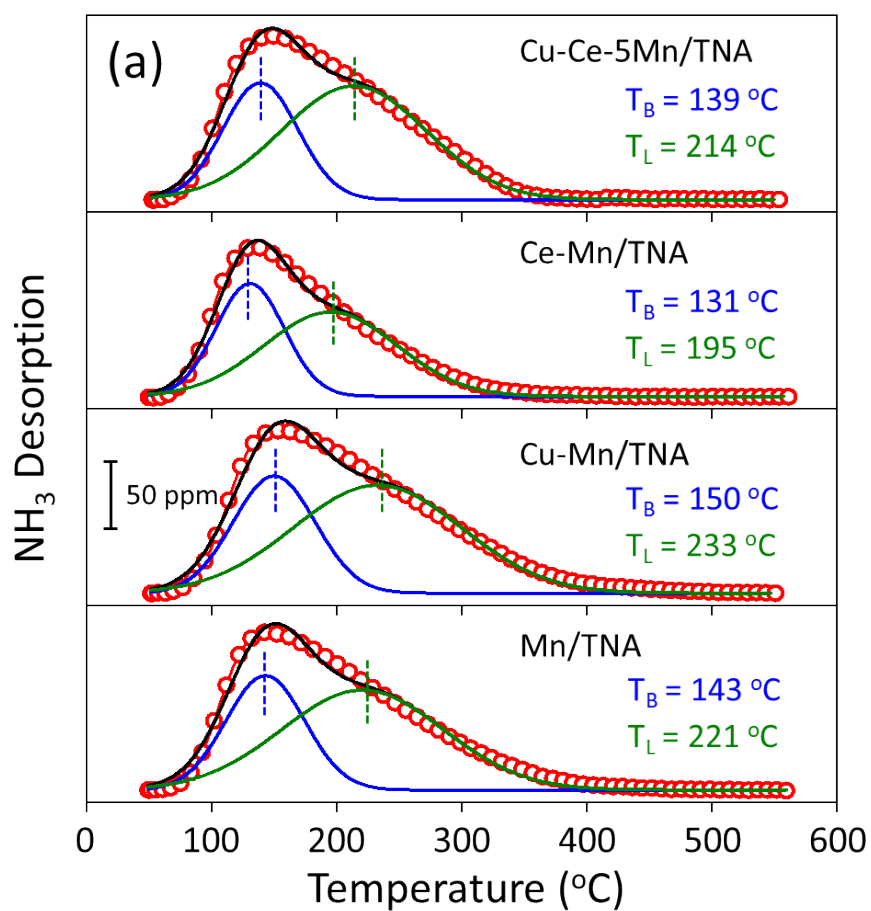

**Figure S9.** (a)  $\text{NH}_3$ -TPD profiles and (b) quantified  $\text{NH}_3$  adsorption capacity and ratio between the Lewis and Brønsted acid sites over the selected catalysts.

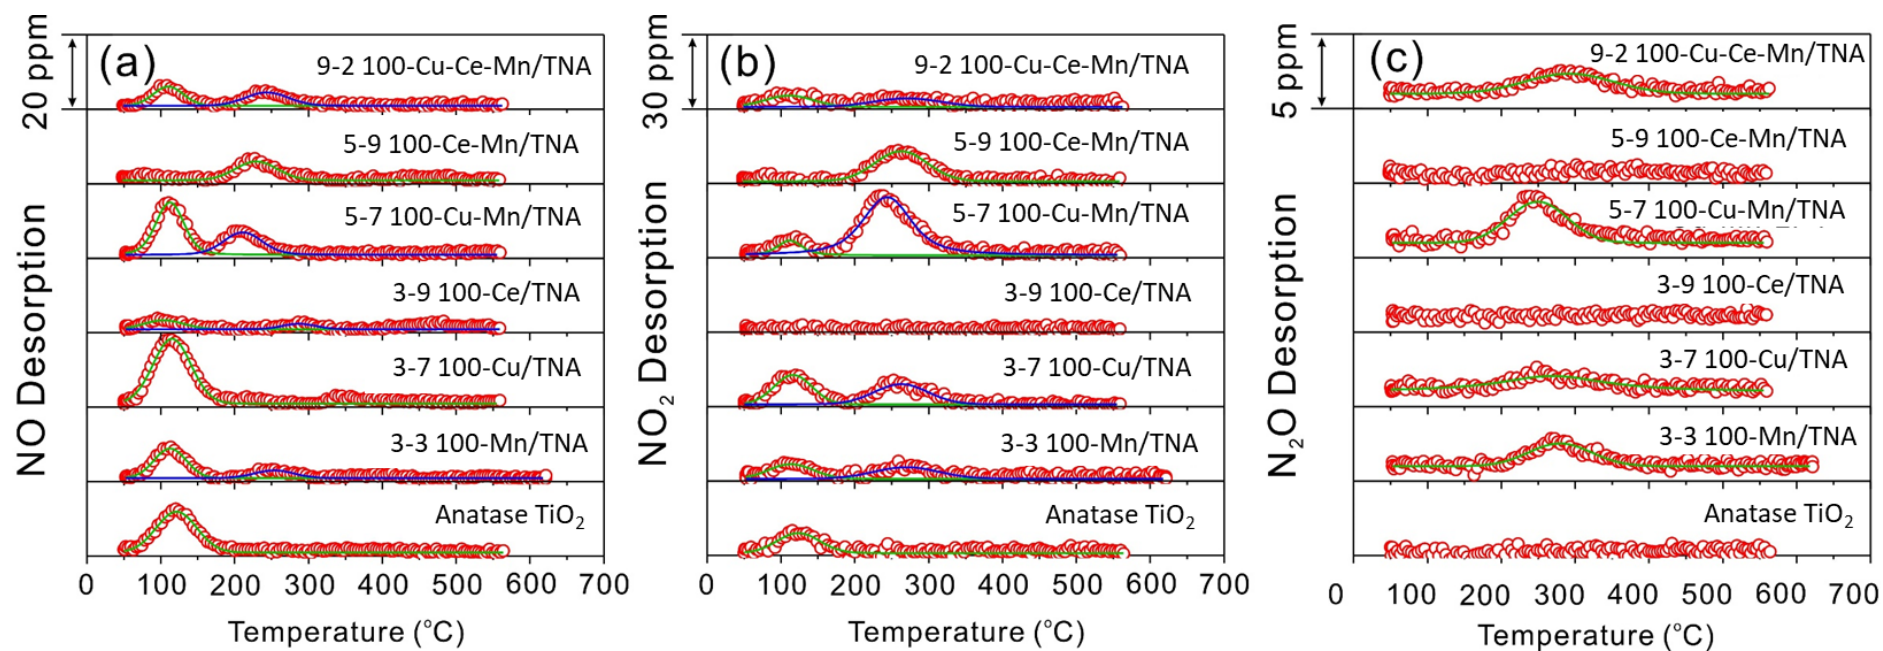

**Figure S10.** Desorption profiles of different  $\text{NO}_x$  species during the NO-TPD tests on selected catalysts using FTIR. (a) NO profiles, (b)  $\text{NO}_2$  profiles, (c)  $\text{N}_2\text{O}$  profiles.

## 2.5. *In situ* DRIFTS and Reaction Mechanism Study

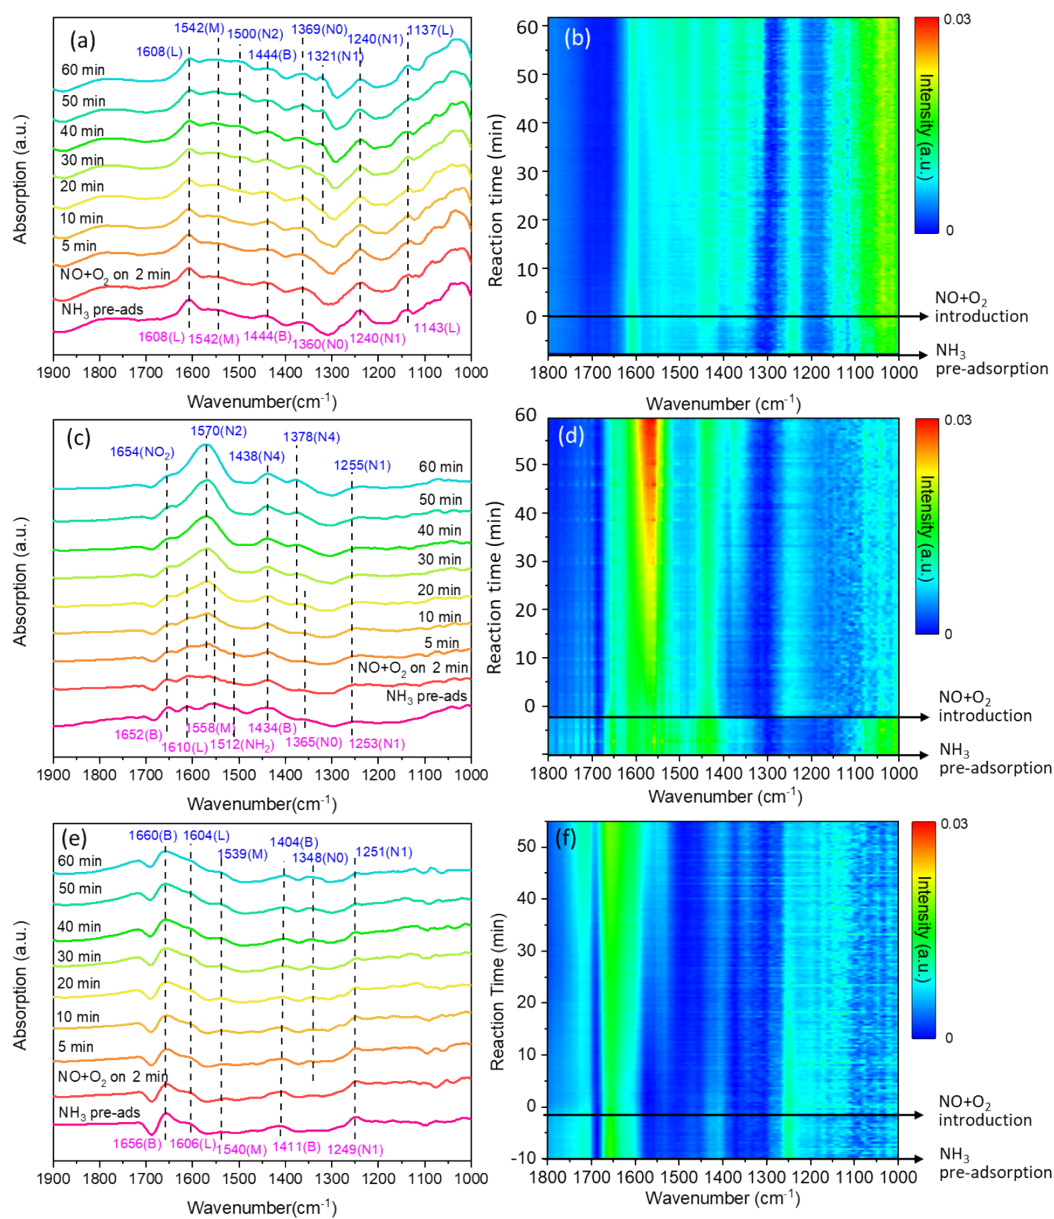

**Figure S11.** *In situ* DRIFT spectra of NO + O<sub>2</sub> reacted with pre-adsorbed NH<sub>3</sub> species at 150 °C over (a, b) Mn/TNA, (c, d) Cu-Mn/TNA and (e, f) Ce-Mn/TNA. Conditions: [NO] = [NH<sub>3</sub>] = 500 ppm, [O<sub>2</sub>] = 5 vol.% (when used) and N<sub>2</sub>.

The *in situ* FTIR spectra of the surface reactions between NO + O<sub>2</sub> and the pre-adsorbed NH<sub>3</sub> species at 150 °C over the selected catalysts of Mn/TNA, Cu-Mn/TNA, Ce-Mn/TNA and Cu-Ce-5Mn/TNA are summarized in **Fig. S11**. As shown, when NH<sub>3</sub> was firstly introduced, the surfaces of all the selected catalysts were quickly covered by the NH<sub>3</sub>-derived species, including the NH<sub>3</sub> coordinated on Lewis acid sites (L) at 1604-1610 and 1041-1143 cm<sup>-1</sup> <sup>13, 14</sup>, the NH<sub>4</sub><sup>+</sup> bounded to Brønsted acid sites (B) at 1434-1444 and 1652-1656 cm<sup>-1</sup> <sup>14, 15</sup>, the NH<sub>3</sub> oxidation intermediates (M) at 1540-1558 cm<sup>-1</sup> <sup>16</sup>, the free nitrate ions (N0) at 1360-1365 cm<sup>-1</sup> <sup>17</sup>, and the monodentate nitrates (N1) at 1240-1253 cm<sup>-1</sup> <sup>14, 18</sup>. Furthermore, the IR band for the -NH<sub>2</sub> groups <sup>19</sup> at 1512 cm<sup>-1</sup> is detectable over the Cu-Mn/TNA catalyst in **Fig. S11c**, indicating the oxidation of the adsorbed NH<sub>3</sub> on the surface, which helps to explain the excellent low temperature activity of the Cu-Mn/TNA catalyst. Meanwhile, the pre-adsorption of NH<sub>3</sub> led to the weak IR bands Ce doped catalyst in **Fig. S11e**, which agrees with the low adsorption capacity of Ce-Mn/TNA catalyst illustrated in **Fig. 6**. After NO and O<sub>2</sub> were introduced subsequently, different catalysts exhibited various activities towards the surface reactions between the NO + O<sub>2</sub> and the pre-adsorbed NH<sub>3</sub> species.

For the monometallic Mn/TNA catalyst in **Fig. S11a** and **b**, no significant changes were observed in the original pre-adsorbed species with only a slight decrease in the IR band intensity of Lewis acid sites (L) at 1608 cm<sup>-1</sup>. Meanwhile, a few new species became detectable with the co-adsorption of NO and O<sub>2</sub>, including the bidentate nitrate (N2) at 1500 cm<sup>-1</sup> <sup>14</sup> and new adsorption sites of (N1) at 1321 cm<sup>-1</sup>. The evolution in the FTIR spectra indicates that the pre-adsorbed NH<sub>3</sub> did not hinder the adsorption of the NO +

O<sub>2</sub> and the formation of adsorbed NO<sub>x</sub> species over Mn/TNA catalyst.

For the bimetallic Cu-Mn/TNA catalyst, vigorous surface reactions were observed after the introduction of NO and O<sub>2</sub>. As shown in **Fig. S11c** and **d**, the NH<sub>3</sub> coordinated on Lewis acid sites (L), the NH<sub>3</sub> oxidation intermediates (M) and the free nitrate ions (N0) were quickly consumed in the first 20 min, and the -NH<sub>2</sub> groups were consumed in only 5 min. The IR bands of the NH<sub>4</sub><sup>+</sup> bounded to Brønsted acid sites (B) were also quickly covered by the peaks of NO<sub>2</sub> at 1654 cm<sup>-1</sup> and the linear nitrite (N4) at 1438 cm<sup>-1</sup> <sup>20</sup>. The IR band for the monodentate nitrates (N1) at 1253 cm<sup>-1</sup> remained unchanged throughout the experiments, indicating that the monodentate nitrates (N1) are not the active intermediates during the SCR-NH<sub>3</sub> process. Meanwhile, with the co-contact of NO and O<sub>2</sub>, IR bands for bidentate nitrate (N2) at 1570 cm<sup>-1</sup> <sup>14</sup> and the linear nitrite (N4) at 1378 cm<sup>-1</sup> <sup>20</sup> quickly became intensified, and the surface of the Cu-Mn/TNA catalysts were quickly saturated with the adsorbed NO<sub>x</sub> species.

The bimetallic Ce-Mn/TNA catalyst did not exhibit surface reaction activity upon the introduction of NO and O<sub>2</sub> at 150 °C. As displayed in **Fig. S11e** and **f**, all the existing pre-adsorbed species remained unchanged and only the free nitrate ions (N0) showed up at 1348 cm<sup>-1</sup> <sup>17</sup>. The absence of other NO<sub>x</sub> species indicates that the introduction of Ce can prohibit the adsorption of NO and O<sub>2</sub> with the catalyst surface saturated with the pre-adsorbed NH<sub>3</sub>-derived species over the Ce-Mn/TNA catalyst.

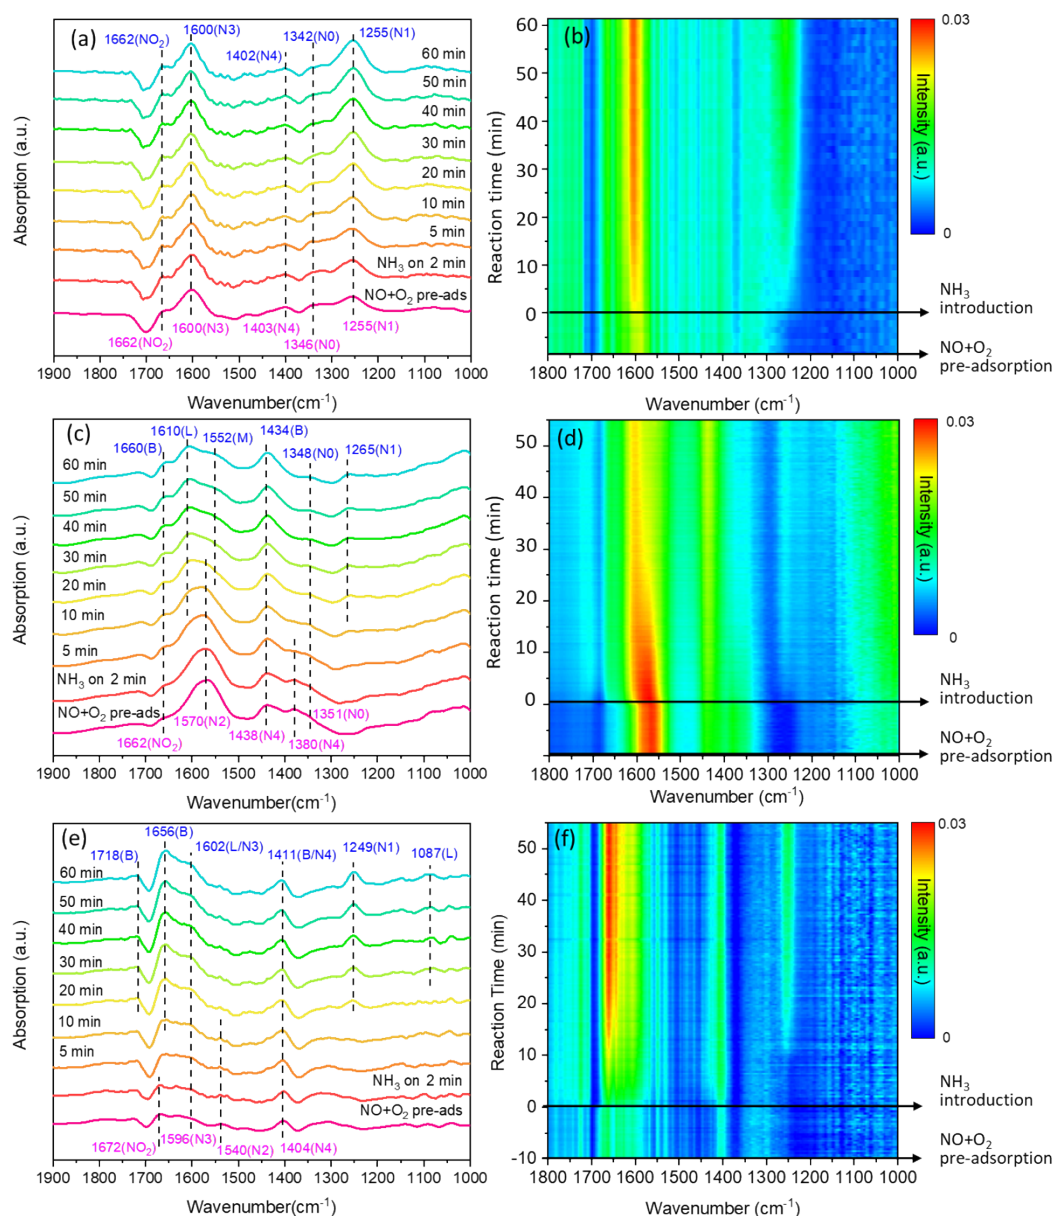

**Figure S12.** *In situ* DRIFT spectra of  $\text{NH}_3$  reacted with pre-adsorbed  $\text{NO}_x$  species at 150 °C over (a, b) Mn/TNA, (c, d) Cu-Mn/TNA and (e, f) Ce-Mn/TNA. Conditions:  $[\text{NO}] = [\text{NH}_3] = 500$  ppm,  $[\text{O}_2] = 5$  vol.% (when used) and  $\text{N}_2$ .

When the reactant was introduced in a reverse order, the *in situ* FTIR spectra of the surface reactions between NH<sub>3</sub> and the pre-adsorbed NO<sub>x</sub> species at 150 °C over the selected catalysts are summarized in **Figure S12**. The co-adsorption of NO and O<sub>2</sub> led to the coverage of the catalyst surfaces by the NO<sub>x</sub> species, including the NO<sub>2</sub> at 1658-1672 cm<sup>-1</sup>, the bidentate nitrate (N2) at 1540-1581 cm<sup>-1</sup> <sup>14</sup>, the free nitrate ions (N0) at 1344-1346 cm<sup>-1</sup> <sup>17</sup>, the monodentate nitrates (N1) at 1255 cm<sup>-1</sup> <sup>14, 18</sup>, the bridging nitrates (N3) at 1596-1600 cm<sup>-1</sup> <sup>21</sup>, and the linear nitrite (N4) at 1404-1438 cm<sup>-1</sup> <sup>20</sup>. The evolution of the *in situ* DRIFTS spectra upon the introduction of NH<sub>3</sub> helps to elucidate the surface reaction intermediates and pathways from another perspective.

For the monometallic Mn/TNA catalyst, unlike the surface reactions between the NO and NO<sub>2</sub> with pre-adsorbed NH<sub>3</sub>, no obvious changes in these original pre-adsorbed species nor new NH<sub>3</sub>-derived species were observed in the IR bands when NH<sub>3</sub> was introduced to the pre-adsorbed NO<sub>x</sub> species covered Mn/TNA sample, as displayed in **Figure S12a** and **b**. Therefore, the pre-adsorbed NO<sub>x</sub> species prohibits the adsorption of NH<sub>3</sub> over the Mn/TNA catalyst surfaces. The different IR band evolutions in **Fig. S11a** and **Figure S12a** when NO and NH<sub>3</sub> were introduced in different sequences indicate that the NH<sub>3</sub>-SCR reaction occurs only when the NH<sub>3</sub>-derived species are pre-adsorbed over the Mn/TNA catalyst surface. Furthermore, the incomplete consumption of the NH<sub>3</sub> coordinated on Lewis acid sites (L) explains the low NO conversion rate over the Mn/TNA catalyst at 150 °C.

When NO and O<sub>2</sub> were pre-adsorbed on the Cu-Mn/TNA catalyst surface and NH<sub>3</sub> was introduced subsequently, the evolution of the FTIR spectra was almost reversed. As

shown in **Figure S12c** and **d** when  $\text{NH}_3$  was introduced, the absorbed  $\text{NO}_2$  and bidentate nitrate (N2) were quickly consumed in 5 and 20 min, respectively. The catalyst surface was finally dominated with the  $\text{NH}_3$  derived species namely the  $\text{NH}_3$  coordinated on Lewis acid sites (L) at  $1602\text{ cm}^{-1}$  and  $1087\text{ cm}^{-1}$  <sup>13, 14</sup>, the  $\text{NH}_4^+$  bounded to Brønsted acid sites (B) at  $1718\text{ cm}^{-1}$ ,  $1656\text{ cm}^{-1}$  and  $1411\text{ cm}^{-1}$  <sup>14, 15</sup> and the monodentate nitrates (N1) at  $1249\text{ cm}^{-1}$  <sup>14, 18</sup>. The quick consumption of the absorbed species over the Cu-Mn/TNA catalyst reveals that Cu can greatly facilitate the adsorption and reaction at low temperature. Especially, the inert  $\text{NH}_4^+$  species bounded to Brønsted acid sites (B) were also activated by adding Cu into the Mn based catalysts.

For the Ce doped bimetallic Ce-Mn/TNA catalyst, the surface reactions were quite different when NO and  $\text{NH}_3$  were introduced in different orders. As exhibited in **Figure S12e** and **f**, when NO and  $\text{O}_2$  were pre-adsorbed and  $\text{NH}_3$  was introduced subsequently, the  $\text{NO}_2$  and bidentate nitrate (N2) were quickly consumed in 5 and 10 min, respectively. The quick consumption of the pre-adsorbed  $\text{NO}_x$  species and saturation by the  $\text{NH}_3$ -derived species is due to the low  $\text{NO}_x$  adsorption capacity of the Ce-doped catalysts, as was demonstrated by the NO-TPD tests. The prohibited adsorption of  $\text{NO}_x$  species leaves the surfaces of the Ce-Mn/TNA catalyst intact and ready for the adsorption of  $\text{NH}_3$ , which helps to explain the different evolution features of FTIR spectra over the Ce-Mn/TNA catalyst with different reactant pre-adsorbed.



## Reference

1. X. Lu, S. Hoang, W. Tang, S. Du, S. Wang, F. Liu, W. Zhong, S. L. Suib, G. Yang, F.-Y. Zhang and P.-X. Gao, *ACS Applied Materials & Interfaces*, 2018, **10**, 35164-35174.
2. Aftertreatment Protocols for Catalyst Characterization and Performance Evaluation: Low Temperature Oxidation Catalyst Test Protocol. <http://cleers.org/ltat-protocols> (accessed date Dec 22, 2016).
3. S. Watanabe, X. Ma and C. Song, *The Journal of Physical Chemistry C*, 2009, **113**, 14249-14257.
4. S. Kuhadomlap, O. Mekasuwandumrong, P. Prasertthdam, S.-I. Fujita, M. Arai and J. Panpranot, *Catalysts*, 2018, **8**.
5. B. Thirupathi and P. G. Smirniotis, *Journal of Catalysis*, 2012, **288**, 74-83.
6. P. Suktha, N. Phattharasupakun, P. Dittanet and M. Sawangphruk, *RSC Advances*, 2017, **7**, 9958-9963.
7. T. Boningari, D. K. Pappas and P. G. Smirniotis, *Journal of Catalysis*, 2018, **365**, 320-333.
8. F. Boccuzzi, A. Chiorino, G. Martra, M. Gargano, N. Ravasio and B. Carrozzini, *Journal of Catalysis*, 1997, **165**, 129-139.
9. B. Murugan and A. V. Ramaswamy, *The Journal of Physical Chemistry C*, 2008, **112**, 20429-20442.
10. X. Gao, Y. Jiang, Y. Fu, Y. Zhong, Z. Luo and K. Cen, *Catalysis Communications*, 2010, **11**, 465-469.
11. L. Chen, D. Weng, Z. Si and X. Wu, *Progress in Natural Science: Materials International*, 2012, **22**, 265-272.
12. B. Thirupathi and P. G. Smirniotis, *Applied Catalysis B: Environmental*, 2011, **110**, 195-206.
13. H. Jiang, L. Zhang, J. Zhao, Y. Li and M. Zhang, *Journal of Materials Research*, 2016, **31**, 702-712.
14. Z. Fan, J.-W. Shi, C. Gao, G. Gao, B. Wang, Y. Wang, C. He and C. Niu, *Chemical Engineering Journal*, 2018, **348**, 820-830.
15. L. Xu, X.-S. Li, M. Crocker, Z.-S. Zhang, A.-M. Zhu and C. Shi, *Journal of Molecular Catalysis A: Chemical*, 2013, **378**, 82-90.
16. P. R. Ettireddy, N. Ettireddy, T. Boningari, R. Pardemann and P. G. Smirniotis, *Journal of Catalysis*, 2012, **292**, 53-63.
17. R. Jin, Y. Liu, Y. Wang, W. Cen, Z. Wu, H. Wang and X. Weng, *Applied Catalysis B: Environmental*, 2014, **148-149**, 582-588.
18. L. Zhang, L. Shi, L. Huang, J. Zhang, R. Gao and D. Zhang, *ACS Catalysis*, 2014, **4**, 1753-1763.
19. D. Sun, Q. Liu, Z. Liu, G. Gui and Z. Huang, *Applied Catalysis B: Environmental*, 2009, **92**, 462-467.
20. D. Meng, W. Zhan, Y. Guo, Y. Guo, L. Wang and G. Lu, *ACS Catalysis*, 2015, **5**, 5973-5983.
21. J. Liu, X. Li, Q. Zhao, J. Ke, H. Xiao, X. Lv, S. Liu, M. Tadé and S. Wang, *Applied Catalysis B: Environmental*, 2017, **200**, 297-308.
